# Supplementary material for: Non-progressive breast carcinomas detected at mammography screening: a population study
Source: Springer Nature journal article supplement (doi:10.1186/s13058-023-01682-9), 2023-07-04
Supplement: MOESM1 [file 25572960]

## Additional file 1

|                                                                                  |   |
|----------------------------------------------------------------------------------|---|
| Registration of DCIS .....                                                       | 1 |
| Screening data for the modelling .....                                           | 2 |
| Supplementary information regarding the hormone therapy variable.....            | 2 |
| The extended APC Poisson regression model for breast carcinoma incidence.....    | 3 |
| Calculating the proportion of breast carcinomas that are screening-detected..... | 6 |
| Analysis of invasive breast cancer only.....                                     | 6 |
| References .....                                                                 | 8 |

### Registration of DCIS

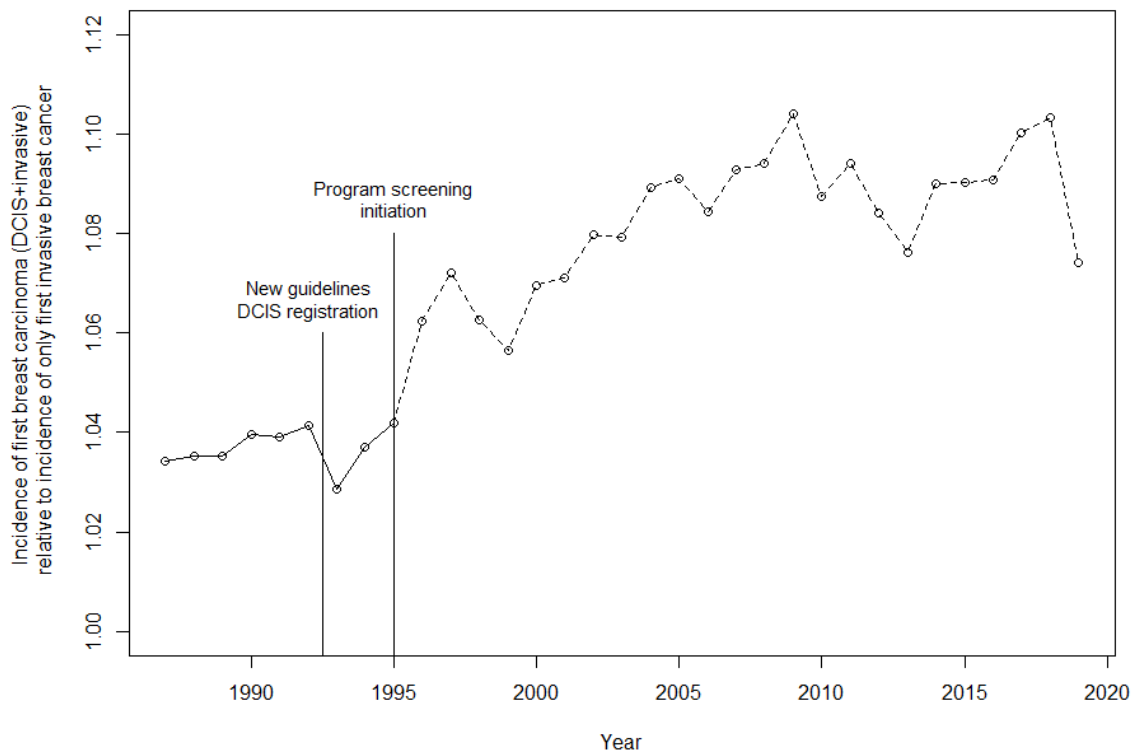

Figure S.1 First cases of DCIS or invasive breast cancer relative to first cases of only invasive breast cancer, for all ages in Norway.

### Screening data for the modelling

To estimate screening effects, we take advantage of the gradual Norwegian country wise screening introduction. When screening starts in a county, the entire age range 50-69 is invited to screening for the first time. Later screening rounds will have both invitations to initial screening for the youngest women, and invitations to continued screening for the other targeted women. The number of earlier screening women gradually increase, and the age range for previously screened women increases with time (Figure S.2a). The gradual implementation of BreastScreen Norway (Figure S.2b) creates many contrasts in incidences between counties with different screening status, which is used to estimate the effects of screening. In the modelling, we excluded data for the initial and second screening round for women aged above 53 years when invited to screening for the first time, as this is atypical data not used in our final calculations regarding the effects of the fully implemented program.

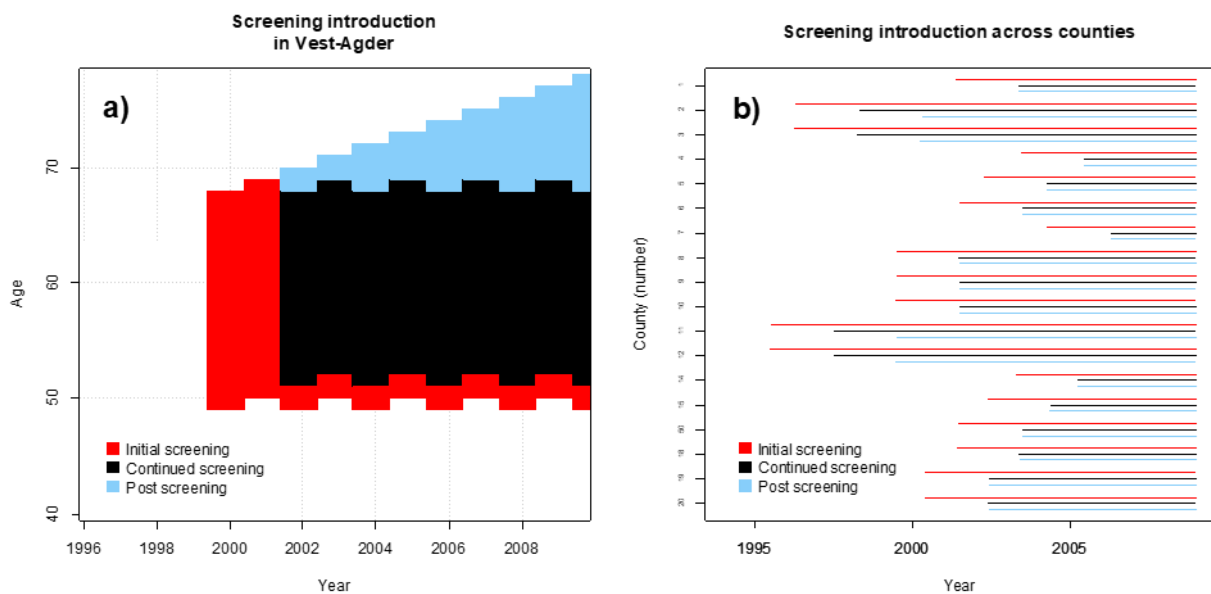

Figure S.2 a) Lexis diagram showing the screening introduction in one example county (Vest-Agder) b) Diagram showing screening status in each county by time.

### Supplementary information regarding the hormone therapy variable

The national sales statistics of hormone therapy preparations have been available electronically since 1987. We here used data on both estrogen and estrogen-progestogen combinations. This equals, G03C and G03F, respectively, according to the Anatomical Therapeutic Chemical classification (1). County-specific sales statistics have been available in electronic form in four of the counties since 1992, and since 1999 for all counties. For the years without electronically available county-specific sales statistics, we used statistics collected from paper lists for 1987, 1991, and 1995, combined with linearly interpolated proportions of national use for the years in between.

The Prescription Database of Norway is available from 2004. For the period 1987-2003, we used the age distribution of prescription users in 2004 as an approximation. Among prescriptions in the Prescription Database of Norway, we found that a small proportion of hormone therapy was prescribed to men. When calculating the hormone therapy variable, we accounted for this use among men.

### The extended APC Poisson regression model for breast carcinoma incidence

The breast carcinoma incidence model is given by

$$R_{c,p,r} = \exp(A_a + ns(A_a, kn_a) + ns(P_p, kn_p) + ns(C_c, kn_c) + S_1 * scr_1 + S_2 * scr_2 + (S_{3+} * scr_{3+} + ns(A_a, kn_{A_a*scr_{3+}}) * scr_{3+}) + (S_{pr} * scr_{pr} + ns(timeScr_{pr}, kn_{scr_{pr}}) * scr_{pr}) + H * ht + County_r)$$

where  $R_{c,p,r}$  is the breast cancer incidence rate in birth cohort  $c$  at period  $p$  for county (region)  $r$ ,  $A_a$  is the age component for age  $a$ ,  $P_p$  is the period component for period  $p$ ,  $C_c$  is the cohort component for birth cohort  $c$ , and  $ns(\dots)$  denotes the natural cubic splines functions. For the age component we specified inner spline knots at age 50, 52, 54, 56, 60, 70 and 80 years ( $kn_a$ ). We used three degrees of freedom for the period component, and for the birth cohort component, both with knots set at the corresponding quantiles ( $kn_p$  and  $kn_c$ , respectively). Further  $S_1$ ,  $S_2$ ,  $S_{3+}$  and  $S_{pr}$  are coefficients for  $scr_1$ ,  $scr_2$ ,  $scr_{3+}$  and  $scr_{pr}$ , respectively, reflecting initial screening, second screening, continued screening and previous screening. For the natural cubic splines applied to the age component for subsequent screening rounds, we specified an inner spline knot at 60 years of age, and boundary knots at ages 53 and 72 years ( $kn_{A_a*scr_{3+}}$ ).  $timeScr_{pr}$  is the time since screening cessation (mean value over each calendar year), and we specified inner spline knots at 1, 2, 5, 10 and 13 years ( $kn_{scr_{pr}}$ ).  $H$  is the coefficient for the hormone therapy variable  $ht$ . Each county was assigned its own level, as given by the *County* variable, while the logarithm of the number of person-years under study was used as offset to adjust for variations in person-years.

For some Age-Period-Cohort combinations we use proportions of the person years under screening in the modelling. Here the applied formula becomes an approximation, but a highly accurate approximation within our relevant parameter space with likely only negligible bias.

#### Remark on the use of proportions in the applied Poisson regression model

The watchful reader might notice that the use of proportions in our Poisson regression formula is an approximation. If we have a screening variable with coefficient  $\beta$  that is present among  $p$  of the observed persons-years, the expected rate across all the person-years becomes:

$$R_{precise} = (1 - p) * \exp(\alpha) + p * \exp(\alpha + \beta)$$

By which:

$$R_{approx} = \exp(\alpha + \beta * p)$$

is an approximation.

As shown by Duffy et al. 2007 (2), the bias can be considerable for very large relative risks. The approximation works, however, very well for small and moderate  $\beta$  values. This as both  $R_{precise}(p = 0) = R_{approx}(p = 0)$ ,  $R_{precise}(p = 1) = R_{approx}(p = 1)$ , and the exponential growth of  $R_{approx}$  is almost linear for moderate  $\beta$  and  $0 \leq p \leq 1$  (Figure S.3). In our setting, most indicators were zero or one, and the largest relative risk was 1.6, supporting little bias.

Simulating the use of screening indicators given as exposed proportion, we find that the bias is probably negligible for our observed relative risks, with maximum biases of 0.2% (Table S.1).

### Approximation of expected value in Poisson regression

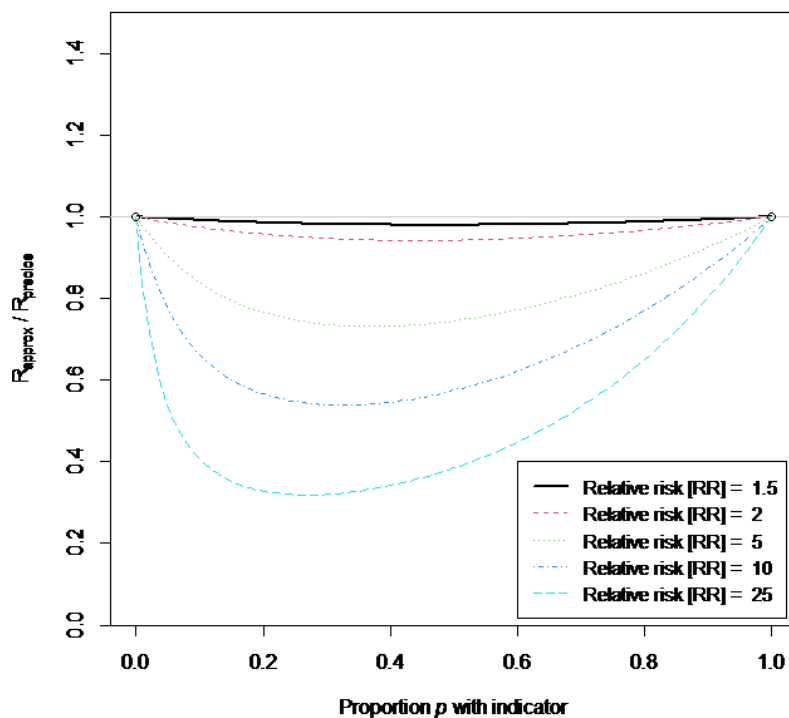

Figure S.3 The effect of using proportions directly in Poisson regression; comparison of approximated vs. true expected values.

Table S.1 Simulations of estimating bias when using screening indicators directly as proportions in Poisson regression. All calculations is based on 1 000 000 simulations.

|                                                 | Screening start | Proportions exposed                    | Median bias % |
|-------------------------------------------------|-----------------|----------------------------------------|---------------|
| <b>Screening intro,<br/>relative risk 1.6</b>   | January 1.      | 0, 0, 1, 1, 0                          | 0.0 %         |
|                                                 | April 1.        | 0, 0, $\frac{3}{4}$ , 1, $\frac{1}{4}$ | + 0.1 %       |
|                                                 | July 1.         | 0, 0, $\frac{1}{2}$ , 1, $\frac{1}{2}$ | + 0.3 %       |
|                                                 | October 1.      | 0, 0, $\frac{1}{4}$ , 1, $\frac{3}{4}$ | + 0.1 %       |
| <b>Leaving screening,<br/>relative risk 0.8</b> | January 1.      | 0, 0, 1, 1, 1                          | 0.0 %         |
|                                                 | April 1.        | 0, 0, $\frac{3}{4}$ , 1, 1             | 0.1 %         |
|                                                 | July 1.         | 0, 0, $\frac{1}{2}$ , 1, 1             | 0.0 %         |
|                                                 | October 1.      | 0, 0, $\frac{1}{4}$ , 1, 1             | - 0.1 %       |

## Estimated parameters for the applied breast carcinoma incidence model

Table S.2 Fitted parameters for the applied incidence model.

|                                                    | Estimate   | Std. Error | Pr(> z ) |
|----------------------------------------------------|------------|------------|----------|
| <i>Age</i>                                         | -0.1372556 | 0.0011491  | < 2e-16  |
| <i>Age</i> spline 1                                | 0.3921366  | 0.0467317  | < 2e-16  |
| <i>Age</i> spline 2                                | 0.6539285  | 0.0496109  | < 2e-16  |
| <i>Age</i> spline 3                                | 1.1542253  | 0.0455539  | < 2e-16  |
| <i>Age</i> spline 4                                | 2.1134119  | 0.0572616  | < 2e-16  |
| <i>Age</i> spline 5                                | 3.6489167  | 0.0708033  | < 2e-16  |
| <i>Age</i> spline 6                                | 4.8412212  | 0.0761691  | < 2e-16  |
| <i>Age</i> spline 7                                | 5.7826226  | 0.1028775  | < 2e-16  |
| <i>Age</i> spline 8                                | 5.7410183  | 0.0825007  | < 2e-16  |
| <i>Cohort</i> spline 1                             | 0.5559320  | 0.0536855  | < 2e-16  |
| <i>Cohort</i> spline 2                             | 0.2417406  | 0.1127648  | 0.032052 |
| <i>Cohort</i> spline 3                             | 0.7539013  | 0.0538048  | < 2e-16  |
| <i>Period</i> spline 1                             | -0.0680136 | 0.0261973  | 0.009426 |
| <i>Period</i> spline 2                             | -0.1487110 | 0.0716958  | 0.038061 |
| <i>Period</i> spline 3                             | NA         | NA         | NA       |
| <i>ht</i>                                          | 1.1062539  | 0.1141012  | < 2e-16  |
| <i>scr</i> <sub>1</sub>                            | 0.4544236  | 0.0298591  | < 2e-16  |
| <i>scr</i> <sub>2</sub>                            | 0.1524205  | 0.0341511  | 8.08e-06 |
| <i>scr</i> <sub>3+</sub>                           | 0.0830507  | 0.0461685  | 0.072041 |
| ( <i>scr</i> <sub>3+</sub> * <i>age</i> ) spline 1 | 0.3028698  | 0.0978182  | 0.001960 |
| ( <i>scr</i> <sub>3+</sub> * <i>age</i> ) spline 2 | 0.0809524  | 0.0513074  | 0.114613 |
| <i>scr</i> <sub>pr</sub>                           | -0.3964735 | 0.0983120  | 5.51e-05 |
| <i>timeScr</i> <sub>pr</sub> spline 1              | 0.2836183  | 0.0919171  | 0.002031 |
| <i>timeScr</i> <sub>pr</sub> spline 2              | 0.3491685  | 0.1280984  | 0.006415 |
| <i>timeScr</i> <sub>pr</sub> spline 3              | 0.3752600  | 0.1159502  | 0.001211 |
| <i>timeScr</i> <sub>pr</sub> spline 4              | 0.2749739  | 0.1114642  | 0.013628 |
| <i>timeScr</i> <sub>pr</sub> spline 5              | 0.3030586  | 0.2253788  | 0.178734 |
| <i>timeScr</i> <sub>pr</sub> spline 6              | 0.3989704  | 0.1491297  | 0.007466 |
| <i>County</i> 1                                    | 0.0005778  | 0.0214856  | 0.978546 |
| <i>County</i> 2                                    | 0.1223072  | 0.0183267  | 2.49e-11 |
| <i>County</i> 3                                    | 0.1499381  | 0.0183871  | 3.51e-16 |
| <i>County</i> 4                                    | -0.0600419 | 0.0238722  | 0.011899 |
| <i>County</i> 5                                    | -0.0553273 | 0.0241242  | 0.021823 |
| <i>County</i> 6                                    | 0.0592307  | 0.0216551  | 0.006235 |
| <i>County</i> 7                                    | 0.0378143  | 0.0225147  | 0.093048 |
| <i>County</i> 8                                    | -0.0066056 | 0.0246959  | 0.789102 |
| <i>County</i> 9                                    | -0.0190587 | 0.0302927  | 0.529249 |
| <i>County</i> 10                                   | 0.0171756  | 0.0257004  | 0.503941 |
| <i>County</i> 11                                   | 0.0407635  | 0.0201634  | 0.043212 |
| <i>County</i> 12                                   | 0.0408964  | 0.0190352  | 0.031677 |
| <i>County</i> 14                                   | -0.0734422 | 0.0315042  | 0.019744 |
| <i>County</i> 15                                   | 0.0091890  | 0.0221901  | 0.678799 |
| <i>County</i> 18                                   | -0.0861724 | 0.0229246  | 0.000171 |
| <i>County</i> 19                                   | -0.1122035 | 0.0278636  | 5.65e-05 |
| <i>County</i> 20                                   | -0.2431744 | 0.0401559  | 1.40e-09 |
| <i>County</i> 50                                   | NA         | NA         | NA       |

County codes: [https://no.wikipedia.org/wiki/Fylkesnummer#Fylkesnummer\\_1946–2018/2020](https://no.wikipedia.org/wiki/Fylkesnummer#Fylkesnummer_1946–2018/2020)

### Calculating the proportion of breast carcinomas that are screening-detected

When calculating the frequency of screening-detected cases using the incidence model, we acquired the number of screening-detected cases for the period 2016-2019 from the Cancer Registry of Norway. These screening-detected cases included women from 49 to 71 years of age, due to the organization of the program by birth cohorts. We considered the screening-detected cases as proportion of all cases for women aged 50-69 years for the period 2016-2019, as this is the targeting age for the screening program. This might give a weakly biased estimate of the proportion of breast carcinomas that are screening-detected (68%), but the increased incidence is most prominent in the 50-69 age range, and including women 49-71 years of age would likely have biased the estimate more (Figure S.4).

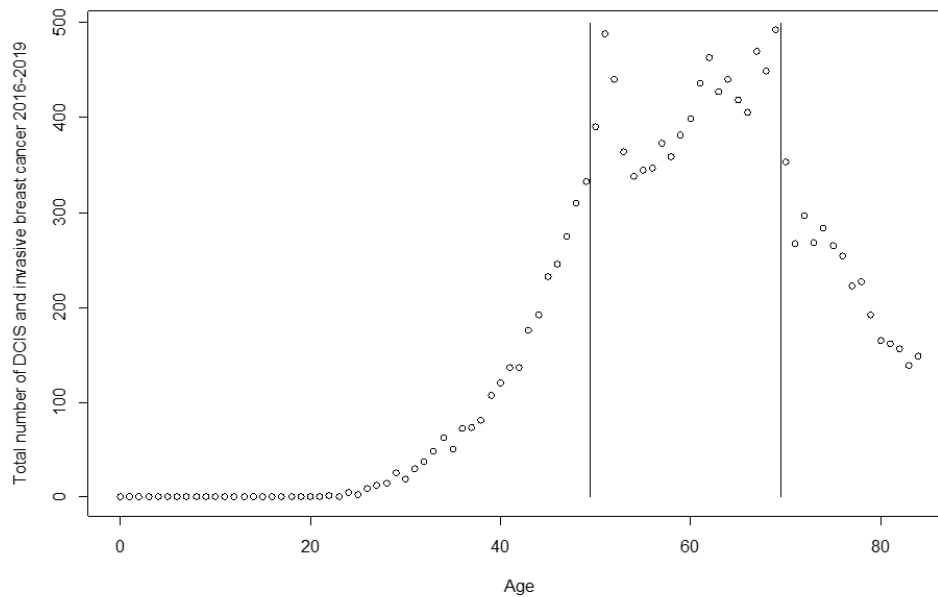

Figure S.4 The total number of first cases of breast carcinomas in Norway 2016-2019, by age.

### Analysis of invasive breast cancer only

When restricting the analyses to only invasive breast cancers, the study included 59 027 cases. In the estimation of the proportion of non-progressive invasive cases related to screening (Table S.4), we applied the observed proportion of screening-detected invasive breast cancers among women 50-69 years of age in the years 2016-2019 of 63%. The analysis estimates that 21% (227/1069) of the excess cases during the screening period would have appeared as a clinical invasive breast cancer by 85 years of age in women who were not invited to screening (Table S.3). However, it is important to realize that the analysis might be somewhat biased by screening-detected DCIS cases that did not have the opportunity to develop into invasive cancers. Hence, the given estimates and related confidence intervals might be somewhat low.

*Table S.3* Basis for excess cumulative incidence calculations for invasive cases only, based on estimates from the APC incidence model calculated for the 1969 birth cohort in 2019. All numbers conditional on the women being alive.

| Age | Relative incidence with screening program 50-69 years of age | Among 100 000 women |                   |                             |
|-----|--------------------------------------------------------------|---------------------|-------------------|-----------------------------|
|     |                                                              | Excess incidence    | Incidence deficit | Excess cumulative incidence |
| 50  | 1.462                                                        | 97                  | -                 | 97                          |
| 51  | 1.462                                                        | 97                  | -                 | 193                         |
| 52  | 1.098                                                        | 21                  | -                 | 214                         |
| 53  | 1.098                                                        | 21                  | -                 | 235                         |
| 54  | 1.030                                                        | 7                   | -                 | 242                         |
| 55  | 1.054                                                        | 13                  | -                 | 255                         |
| 56  | 1.077                                                        | 19                  | -                 | 274                         |
| 57  | 1.099                                                        | 25                  | -                 | 299                         |
| 58  | 1.121                                                        | 32                  | -                 | 331                         |
| 59  | 1.140                                                        | 39                  | -                 | 370                         |
| 60  | 1.158                                                        | 45                  | -                 | 415                         |
| 61  | 1.173                                                        | 51                  | -                 | 466                         |
| 62  | 1.185                                                        | 57                  | -                 | 524                         |
| 63  | 1.195                                                        | 63                  | -                 | 587                         |
| 64  | 1.203                                                        | 69                  | -                 | 655                         |
| 65  | 1.209                                                        | 74                  | -                 | 729                         |
| 66  | 1.213                                                        | 79                  | -                 | 808                         |
| 67  | 1.215                                                        | 83                  | -                 | 891                         |
| 68  | 1.216                                                        | 87                  | -                 | 978                         |
| 69  | 1.216                                                        | 90                  | -                 | 1069                        |
| 70  | 0.663                                                        | -                   | -146              | 923                         |
| 71  | 0.709                                                        | -                   | -130              | 793                         |
| 72  | 0.823                                                        | -                   | -81               | 712                         |
| 73  | 0.890                                                        | -                   | -52               | 659                         |
| 74  | 0.919                                                        | -                   | -39               | 620                         |
| 75  | 0.934                                                        | -                   | -33               | 587                         |
| 76  | 0.948                                                        | -                   | -27               | 560                         |
| 77  | 0.958                                                        | -                   | -22               | 539                         |

|    |       |   |     |     |
|----|-------|---|-----|-----|
| 78 | 0.962 | - | -20 | 518 |
| 79 | 0.955 | - | -25 | 494 |
| 80 | 0.934 | - | -36 | 458 |
| 81 | 0.907 | - | -53 | 405 |
| 82 | 0.889 | - | -64 | 341 |
| 83 | 0.893 | - | -64 | 277 |
| 84 | 0.919 | - | -50 | 227 |

Table S.4 Non-progressive invasive breast cancers, with follow-up until 85 years of age

|                     | Proportion non-progressive cancers of screening-detected cases | Probability of a non-progressive cancer after 10 screening rounds | Number of women screened for 10 rounds per screening-detected non-progressive cancer |
|---------------------|----------------------------------------------------------------|-------------------------------------------------------------------|--------------------------------------------------------------------------------------|
| Invasive cases only | 5.2% (-9.0,17.4)                                               | 0.2% (-0.4,0.8)                                                   | 441 (-3828,4355) <sup>a</sup>                                                        |

<sup>a</sup> The low probability of a non-progressive invasive cancer contributes to a very wide confidence interval.

## References

1. Norwegian Institute of Public Health. WHO Collaborating Centre for Drug Statistics Methodology. [22 April 2023]. Available from: [www.whocc.no/](http://www.whocc.no/).
2. Duffy SW, Jonsson H, Agbaje OF, Pashayan N, Gabe R. Avoiding bias from aggregate measures of exposure. J Epidemiol Community Health. 2007;61(5):461-3.
